# Supplementary material for: Cognitive impairment following maternal separation in the rat is regulated by effects of the NAD + /SIRT3 axis on hippocampal synaptic plasticity
Source: Research Square preprint supplement (doi:10.21203/rs.3.rs-4207040/v1), 2024-04-11
Supplement: Supplementary file 1 [file 3c79cbfd5bdf56c481631ac0.docx]

**SUPPLEMENTAL INFORMATION**

**MATERIAL AND METHODS**

***1. Bioinformatic analysis***

The GSE53987 dataset was accessed from the GEO database, and the series matrix data along with the gene annotation platform GPL570 (Affymetrix Human Genome U133 Plus 2.0 Array) were obtained [1]. Probes were annotated based on the platform file. If multiple probes corresponded to a single gene symbol, only one probe was chosen for further analysis using the R programming language. Subsequently, the processed series matrix data was stored, and a bar plot was generated based on gene expression levels (schizophrenia-hippocampus vs. control-hippocampus and schizophrenia-prefrontal cortex vs. control-prefrontal cortex). Group comparisons were assessed for significance using the Student's t-test.

***2. Clinical research***

Peripheral blood samples were collected from schizophrenia patients in the acute phase of onset, as well as age- and gender-matched healthy controls. Peripheral blood mononuclear cells (PBMCs) were isolated from whole blood obtained with consent from volunteer donors using Lympholyte®-H solution (Cedarlane, ON, Canada) via density-gradient centrifugation. The isolated PBMCs were subsequently utilized for SIRT3 analysis.

***3. Behavioral testing of animals***

The experimental rats were evaluated during the adult stage of development, and the number of animals used for testing was determined based on prior publications and expertise in phenotyping. Prior to all tests, the animals underwent a 30-minute acclimation period in the behavioral room. Behavioral assessments were conducted between 08:00 and 22:00, with each rat being evaluated for various behavioral measures. Following each trial, the apparatus was cleaned using 75% alcohol.

***3.1 Open-field Test (OFT)***

The OFT is widely used to evaluate spontaneous locomotor activity and depressive-/anxiety-like behavior in rodents [2]. The test was conducted in a 100 x 100 cm square arena with an indirect illumination of 60 lux. Rat movements were recorded using Ethovision software 11.5 (Noldus) for a duration of 10 minutes, with the software directly measuring total distance traveled, time spent, and distance from the center (excluding a 5 cm border around the arena).

***3.2 Novel object recognition test***

The novel object recognition test was performed using the open-field apparatus and had three components: habituation, training, and testing [3]. Rats were initially placed in the center of the open field for a 24-hour adaptation period to the apparatus. During the training phase, the rats were allowed to explore two identical objects for 10 minutes. Subsequently, the testing phase commenced after 24 hours. Rats were then presented with one familiar and one novel object (replacing one of the training objects) for a 10-minute exploration period, with their locomotion monitored via video tracking and analyzed using Panlab SMART v3.0 (Barcelona, Spain). The formula used to calculate the preference for exploring the novel object was: [(time spent with the novel object) / (total time spent with both objects) × 100%].

***3.3 Barnes maze test***

We examined spatial memory with the Barnes maze [4], which was positioned 140 cm above the ground and featured 20 evenly spaced holes around its periphery, each with a diameter of 10 cm. The target box, connecting to a dark chamber, provided an escape route for the animals from bright light exposure. Prior to the main experiment, animals were acclimated to the target box for four minutes. On the initial day, each animal spent five seconds in the central black cube of the maze before being released to explore and locate the target box once the cube was removed. Upon reaching the escape box, the animal remained there for 30 seconds; if it failed to locate the target box within three minutes, it was guided to the target box and allowed to stay there for one minute. Each animal underwent two trials per day with a four-hour interval. The time taken to reach the target box was recorded as latency. The testing spanned four days and was monitored using a combination of a digital camera and a computer system.

***3.4 Elevated-Plus Maze (EPM)***

The EPM is used to assess anxiety state of animals [5]. This apparatus comprises a four-armed labyrinth positioned 80 cm above the ground, with each arm measuring 10 cm in width. Two opposing arms are open, lacking walls, while the other two arms are enclosed by side walls. The light intensity on the open arms was set to 20 Lux. Rats were initially placed on the central platform and allowed to freely explore the cross-shaped maze for a duration of 5 minutes (as depicted in Figure Supplement 1D). The maze was cleaned and disinfected with water and 70% ethanol after each rat. Animal movement was recorded using Ethovision software 11.5 (Noldus). The software directly measures the time spent in the open and closed arms, as well as the number of entries into the open arms.

***3.5 Sucrose preference Test (SPT)***

SPT is a common method to assess depressive-like behavior in animals, especially anhedonia, the core symptom of depression. The SPT was carried out according to previous studies [6, 7]. rats underwent the SPT procedure. After a 24-hour period of fasting and water deprivation, each rat was presented with two bottles simultaneously: one containing tap water and the other a 1% sucrose solution. The weights of both bottles were recorded, and their positions were interchanged after 1 hour. Fluid intake was observed over a 2-hour period (as illustrated in Figure Supplement 1G). Subsequently, the bottles were removed and reweighed. The sucrose preference ratio was calculated as the proportion of sucrose solution consumption relative to the combined consumption of tap water and sucrose solution.

***3.6 Prepulse Inhibition (PPI) test***

The PPI test was conducted in a sound-attenuated chamber using a small Plexiglas cage mounted on a load-cell platform to measure the pressure response of the startled rat (AniLab Scientific Instruments Co., Ltd., China, [www.anilab.cn](http://www.anilab.cn/)). A 70 dB broad-band white noise served as the background noise, while a high-pass (>4 kHz) white noise was utilized as the pulse stimulus. Following a five-minute acclimatization period, a series of five startle stimuli (120 dB for 20 ms each) were delivered. During the testing session, an initial delay of 50 ms was followed by a 20 ms pre-pulse stimulus (at 75, 78, or 82 dB), a 100 ms delay, and then a 40 ms startle stimulus of 120 dB randomly presented for approximately 40 trials controlled by software. The interstimulus intervals varied between 10 and 30 seconds. The formula for calculating the percentage of PPI induced by each pre-pulse intensity was [1 - (startle amplitude on pre-pulse trial)/(startle amplitude on pulse alone)] × 100% [8].

***4. Sample collection***

Following the conclusion of behavioral testing, the animals were euthanized under anesthesia using 1% pentobarbital sodium. Subsequently, rat hippocampal tissues were harvested from approximately 15 animals per group, promptly frozen on dry ice, and stored at −80°C until needed for subsequent dissection and analysis of gene and protein expression.

***5. Protein extraction and western blot analysis***

Hippocampal tissue was homogenized in protein lysis buffer (Beyotime Biotech, China) to extract total proteins. Protein concentration was quantified using a BCA kit (P0010S, Beyotime Biotech). Subsequently, proteins from each sample underwent separation via 10% SDS-polyacrylamide gel electrophoresis and transfer onto polyvinylidene fluoride (PVDF) membranes. For Western blot analysis, primary antibodies targeting specific proteins were applied: rabbit anti-SIRT3 (1:1000 dilution, ab189860, Abcam), and rabbit anti-β-actin (1:1000 dilution, ab181602, Abcam). Incubation with these antibodies occurred overnight at 4 °C. Subsequently, secondary horseradish peroxidase (HRP)-conjugated antibodies were employed at a 1:5000 dilution: goat anti-rabbit HRP (Millipore, Watford, UK) and goat anti-mouse (sc-2005) (Santa Cruz, Insight Biotechnology, Wembley, UK). Visualization of the blots was achieved using enhanced chemiluminescence detection reagents with a Chemidoc TM Touch Imaging System (Bio-Rad).

***6. Electron microscopy***

The animals were humanely euthanized using an overdose of inhalation anesthetic (isoflurane) and subsequently perfused through the heart with a buffered solution containing 2.5% glutaraldehyde and 2.0% paraformaldehyde in 0.1M phosphate buffer (pH 7.4). Coronal vibratome sections, 80 microns thick, were prepared, post-fixed in potassium ferrocyanide (1.5%) and osmium (2%), and stained first with thiocarbohydrazide (1%) followed by osmium tetroxide (2%). Subsequently, they underwent overnight staining in uranyl acetate (1%), rinsing in distilled water at 50°C, and subsequent staining with lead aspartate at pH 5.0 at the same temperature. Dehydration was then carried out using escalating alcohol concentrations, followed by embedding in durcupan resin and hardening at 65°C for 24 hours between glass slides. The coronal section containing the hippocampus was isolated from the remaining tissue using a razor blade, affixed to an aluminum stub with conductive glue, trimmed with a glass knife, and finally mounted in a scanning electron microscope (Zeiss Merlin, Zeiss NTS) equipped with a block-face cutting microtome (3View, Gatan) for image acquisition.

***7.*** ***Immunofluorescent staining assay***

Rats were anesthetized and then perfused through the heart initially with PBS, followed by 4% paraformaldehyde. Subsequently, the brain was post-fixed in 4% paraformaldehyde overnight. The brain sections were embedded in paraffin and sliced at a thickness of 4 μm. The paraffin-embedded tissue cross-sections underwent dewaxing in xylene, rehydration, followed by antigen retrieval in sodium citrate using microwave treatment, and then rinsed with PBS. Subsequently, they were blocked with 1% BSA (Roche, Switzerland) in PBS for 2 hours at room temperature. The sections were incubated overnight at 4 °C with primary antibodies including rabbit anti-SIRT3 (1:100, ab189860, Abcam, UK), mouse anti-NeuN (1:100, ab279296, Abcam), mouse anti-CD68 (1:100, ab955, Abcam), rabbit anti-SYN (1:100, ab214316, Abcam), and goat anti-Iba1 (1:100, ab5076, Abcam). This was followed by incubation with secondary antibodies: Alexa Fluor CY3-conjugated goat anti-rabbit IgG (1:250, Bost Biotech, China), Alex Fluor FITC-conjugated goat anti-mouse IgG (1:250, Bost Biotech, China), and Alexa Fluor FITC-conjugated donkey anti-goat IgG (1:200, Bost Biotech, China) for 60 minutes. Nuclear staining was performed using DAPI (Thermo Fisher). Colocalizations were visualized using confocal microscopy. Image J (National Institutes of Health, Bethesda, MD) was utilized for analyzing the integral optical density (IOD) of the target protein.

***8. Golgi-cox staining***

At the conclusion of the behavioral tests, four rats were randomly selected from each group. The brains were swiftly extracted from deeply anesthetized rats. Golgi-Cox staining was carried out following the guidelines provided by the manufacturer of the FD Rapid GolgiStain™ Kit (FD Neuro Technologies Inc., USA). Brain tissue sections, 150 µm thick, were obtained along the coronal plane utilizing a vibrating slicing device (Leica VT1200S, Germany), and then mounted on gelatin-coated slides as per the specified procedure. Subsequently, the slides were processed in accordance with the kit's instructions. Microscopic images were captured and analyzed using NIH ImageJ software. Analysis of spine characteristics, including density and morphology, was performed on pyramidal neurons sourced from the prefrontal cortex and hippocampus.

***9. Electrophysiology***

Following anesthesia of rats with 1% pentobarbital sodium, the brains were promptly extracted and sliced in chilled artificial cerebrospinal fluid (ACSF) with the following composition (in mM): NaCl 125, KCl 3, NaH2PO4 1.25, NaHCO3 25, CaCl2 2, MgSO4 1, glucose 10. The ACSF was pre-saturated with 95% O2 and 5% CO2. Horizontal slices (300 μm thick) were generated using a Leica VT1000S vibratome. These slices were then incubated at 32°C for 30 minutes in ACSF before being transferred to a recording chamber perfused continuously at a rate of 2 ml/min with externally filtered ACSF at room temperature. Microelectrodes (~1 MΩ) were filled with the filtered external ACSF for recording extracellular field potentials. Evoked synaptic responses were elicited through stimulation with a concentric bipolar tungsten electrode (World Precision Instruments). Long-term potentiation (LTP) was assessed post high-frequency stimulation (HFS), which consisted of 4 trains of 100 pulses at 100 Hz, with an inter-train interval of 20 seconds, and evaluation at 30-50 minutes post-HFS. LTP was quantified based on 30% to 50% of the baseline maximum slope. Pair-pulse ratio (PPR) was determined using half of the maximum stimulation amplitude. The PPR protocol involved inducing two consecutive field excitatory postsynaptic potentials (fEPSPs) with a 50 ms inter-pulse interval and recording for 5 minutes. PPR was calculated by dividing the mean slope of the 2nd fEPSPs by that of the 1st fEPSPs. Data acquisition utilized Axopatch 200B patch clamp amplifiers, sampled at 5 kHz, and filtered at 2 kHz employing a Digidata 1550 analog-digital interface.

**Figure legends**

**Supplementary Figure 1. Experimental Timeline.**

Maternal separation (MS) protocols were randomly applied to litters on postnatal day 9 (PND9). Drug and virus administration, as well as behavioral tests, were conducted during adulthood. PND denotes postnatal day, while MS stands for maternal separation.

**Supplementary Figure 2. Reduced Expression of SIRT3 in Schizophrenia Patients.**

(A) SIRT3 mRNA level was decreased significantly in the hippocampus of schizophrenia (SZ) patients as compared with healthy controls (HCs) from the GEO profile database.

(B) SIRT3 mRNA level was decreased significantly in the prefrontal cortex of SZ patients as compared with HCs from the GEO profile database.

Healthy control: n = 19, schizophrenia patients: n = 15. n.s., was not significant; *p < 0.05. Data are represented as the mean ± SEM.

(C) Representative immunoblot image of SIRT3 protein expression in PBMC in schizophrenia patients and healthy controls

(D) The analysis of SIRT3 protein expression in PBMC in schizophrenia patients and healthy controls (n = 12, per group).

**Supplementary Figure 3. Impact of Early Life Stress on Anxiety and Depressive-like Behaviors.**

(A) Body weight (n = 15, per group).

(B) The distance moved in the central area of OFT (n = 15, per group).

(C) The time spent in the central area of OFT (n = 15, per group).

(D) Schematic of the EPM experiment.

(E)The ratio of the time spent in the open arms in the EPM (n = 15, per group).

(F) The ratio of the frequencies of entering the open arms in the EPM (n = 15, per group).

(G) Schematic of the SPT experiment.

(H) The sucrose preference ratio in the SPT (n = 15, per group).

**Supplementary Figure 4. Normalization of Microglial Engulfment of Hippocampal Neuronal Spines by NAM Administration.**

(A) Representative images of CD68+ (green pixels), and SYN+ (red pixels) in the hippocampus.

(B) NAM administration reversed MS induced the percentage of CD68+ and SYN+ co-labeling area increase in the CA1 region (n = 4, per group).

(C) NAM administration reversed MS induced the percentage of CD68+ and SYN+ co-labeling area increase in the CA3 region (n = 4, per group).

(D) NAM administration reversed MS induced the percentage of CD68+ and SYN+ co-labeling area increase in the DG region (n = 4, per group).

The data are presented as mean ± SEM for each group. n.s. was not significant; *p < 0.05, **p < 0.01, ***p < 0.001, and ****p < 0.0001.

**Supplementary Figure 5. Impact of SIRT3 Activation and Inhibition on Microglial Activation and Engulfment of Hippocampal Neuronal Spines.**

(A) Representative images of CD68+ (green pixels), and SYN+ (red pixels) in the hippocampus.

(B) Decreased percentage of CD68+ and SYN+ co-labeling area in the CA1 region after HNK administration on MS rats. And increased percentage of CD68+ and SYN+ co-labeling area in the CA1 region after 3-TYP administration on control rats (n = 4, per group).

(C) Decreased percentage of CD68+ and SYN+ co-labeling area in the CA3 region after HNK administration on MS rats. And increased percentage of CD68+ and SYN+ co-labeling area in the CA1 region after 3-TYP administration on control rats (n = 4, per group).

(D) Decreased percentage of CD68+ and SYN+ co-labeling area in the DG region after HNK administration on MS rats. And increased percentage of CD68+ and SYN+ co-labeling area in the CA1 region after 3-TYP administration on control rats (n = 4, per group).

The data are presented as mean ± SEM for each group. *p < 0.05, **p < 0.01, ***p < 0.001, and ****p < 0.0001.

**Supplementary Figure 6. Inhibition of SIRT3 Blocks NAM-Induced Restoration of Mitochondrial Morphology in the Hippocampus.**

(A) Representative immunofluorescence images show the expression of NeuN+ (green pixels) and SIRT3+ (red pixels) in the hippocampus.

(B) NAM and 3-TYP administration had no effect on the percentage of NeuN+ area in the hippocampus (n = 4, per group).

(C) 3-TYP administration did not affect the NAM-induced rescue on the percentage of SIRT3+ area in the hippocampus (n = 4, per group).

(D) 3-TYP administration did not affect the NAM-induced rescue on the percentage of NeuN+ and SIRT3+ co-labeling area in the hippocampus (n = 4, per group).

(E) Representative electron micrographs from the hippocampal neurons in MS+Vehicle, MS+NAM, and MS+NAM+3-TYP rats.

(F) Mitochondria density was comparable in the three groups (n = 3, per group).

(G) Mitochondria area was comparable in the three groups (n = 3, per group).

The data are presented as mean ± SEM for each group. n.s. was not significant; *p < 0.05, **p < 0.01, ***p < 0.001, and ****p < 0.0001.

**Supplementary Figure 7. Inhibition of SIRT3 Blocks NAM-Induced Normalization of Microglial Activation and Engulfment of Hippocampal Neuronal Spines.**

(A) Representative images of CD68+ (green pixels), and SYN+ (red pixels) in the hippocampus.

(B) 3-TYP administration blocked NAM-induced rescue on the percentage of CD68+ and SYN+ co-labeling area in the CA1 region (n = 4, per group).

(C) 3-TYP administration blocked NAM-induced rescue on the percentage of CD68+ and SYN+ co-labeling area in the CA3 region (n = 4, per group).

(D) 3-TYP administration blocked NAM-induced rescue on the percentage of CD68+ and SYN+ co-labeling area in the DG region (n = 4, per group).

The data are presented as mean ± SEM for each group. *p < 0.05, **p < 0.01, ***p < 0.001, and ****p < 0.0001.

**Supplementary Figure 8. Inhibition of SIRT3 Blocks NAM-Induced Rescue of Cellular and Behavioral Phenotypes.**

(A) The representative micrographs of hippocampal dendrites in the CA1 region. Scale bar, 2 μm.

(B) 3-TYP administration blocked NAM-induced rescue on the spine density (n = 5, per group).

(C) Representative trajectories of baseline (top) and post-HFS (down) fEPSP, recorded from hippocampal CA1 region in brain slices at the adult rats. Scales: 0.02 mV, 2 ms.

(D) 3-TYP administration blocked NAM-induced rescue on fEPSP. Arrows indicate LTP induction (n = 4 per group).

(E) Quantitative analysis of data in (G).

(F) 3-TYP administration blocked NAM-induced rescue on the PPR (n = 4 per group).

(G) 3-TYP administration blocked NAM-induced rescue on the latency to the target hole in the Barnes maze test (n = 12, per group). &p < 0.05, &&p < 0.01 as MS+Vehicle rats compared to the MS+NAM rats. #p < 0.05, and ####p < 0.0001 as MS+NAM rats compared to the MS+NAM+3-TYP rats.

(H) 3-TYP administration blocked NAM-induced rescue on the discrimination ratio in the novel object recognition test (n = 12, per group).

(I) 3-TYP administration blocked NAM-induced rescue on the total distances traveled during the OFT (n = 12, per group).

(J) 3-TYP administration blocked NAM-induced rescue on PPI at different pre-pulse intensities (n = 12, per group).

The data are represented as the mean ± SEM. n.s. was not significant; *p < 0.05, **p < 0.01, ***p < 0.001, and ****p < 0.0001.

**REFERENCES**

1. Lanz TA, Reinhart V, Sheehan MJ, Rizzo SJS, Bove SE, James LC, Volfson D, Lewis DA, Kleiman RJ. Postmortem transcriptional profiling reveals widespread increase in inflammation in schizophrenia: a comparison of prefrontal cortex, striatum, and hippocampus among matched tetrads of controls with subjects diagnosed with schizophrenia, bipolar or major depressive disorder. Transl Psychiatry. 2019;9:151.

2. Kraeuter AK, Guest PC, Sarnyai Z. The Open Field Test for Measuring Locomotor Activity and Anxiety-Like Behavior. Methods Mol Biol. 2019;1916:99-103.

3. Cohen SJ, Munchow AH, Rios LM, Zhang G, Asgeirsdottir HN, Stackman RW, Jr. The rodent hippocampus is essential for nonspatial object memory. Curr Biol. 2013;23:1685-90.

4. Imayoshi I, Sakamoto M, Ohtsuka T, Takao K, Miyakawa T, Yamaguchi M, Mori K, Ikeda T, Itohara S, Kageyama R. Roles of continuous neurogenesis in the structural and functional integrity of the adult forebrain. Nat Neurosci. 2008;11:1153-61.

5. Kraeuter AK, Guest PC, Sarnyai Z. The Elevated Plus Maze Test for Measuring Anxiety-Like Behavior in Rodents. Methods Mol Biol. 2019;1916:69-74.

6. Zhang Y, Su WJ, Chen Y, Wu TY, Gong H, Shen XL, Wang YX, Sun XJ, Jiang CL. Effects of hydrogen-rich water on depressive-like behavior in mice. Sci Rep. 2016;6:23742.

7. Zhang Y, Liu L, Liu YZ, Shen XL, Wu TY, Zhang T, Wang W, Wang YX, Jiang CL. NLRP3 Inflammasome Mediates Chronic Mild Stress-Induced Depression in Mice via Neuroinflammation. Int J Neuropsychopharmacol. 2015;18.

8. Valsamis B Schmid S. Habituation and prepulse inhibition of acoustic startle in rodents. J Vis Exp. 2011;e3446.
